# Supplementary material
Source: PubMed Central journal article supplement (PMC3043228)

## Supplemental figure captions

**Fig S1A.** Representative current traces that were used to construct the normalized whole-cell conductance curves of Fig 1 for the zero Ca condition, illustrating recovery of wt-Kir1.1b channel activity following a 15min acidification in 1mM K, 0mM Ca, 0mM Mg +1mM EGTA.

**Fig S1B.** Steady state current voltage relations for the zero Ca condition, derived from the current traces of Fig S1A, prior to, during, and after a 15 min internal acidification to pH 6.3. Whole-cell conductances, internal pH ( $\text{pH}_i$ ) and times are indicated for each current-voltage relation.

**Fig S2A.** Representative current traces that were used to construct the normalized whole-cell conductance curves of Fig 1 for the 2mM Ca condition, illustrating recovery of wt-Kir1.1b channel activity following a 15min acidification in 1mM K, 2mM Ca, 0 mM Mg.

**Fig S2B.** Steady state current voltage relations for the 2mM Ca condition, derived from the current traces of Fig S2A, prior to, during, and after a 15 min internal acidification to pH 6.3. Whole-cell conductances, internal pH ( $\text{pH}_i$ ) and times are indicated for each current-voltage relation.

**Fig S3.** Initial recovery rates of N105E-Kir1.1b compared to wt-Kir1.1b as a function of external K in zero Ca and Mg conditions.

**Fig S1A:**

**wt-Kir1.1b (1mM K, 0 mM Ca, 0 mM Mg)**

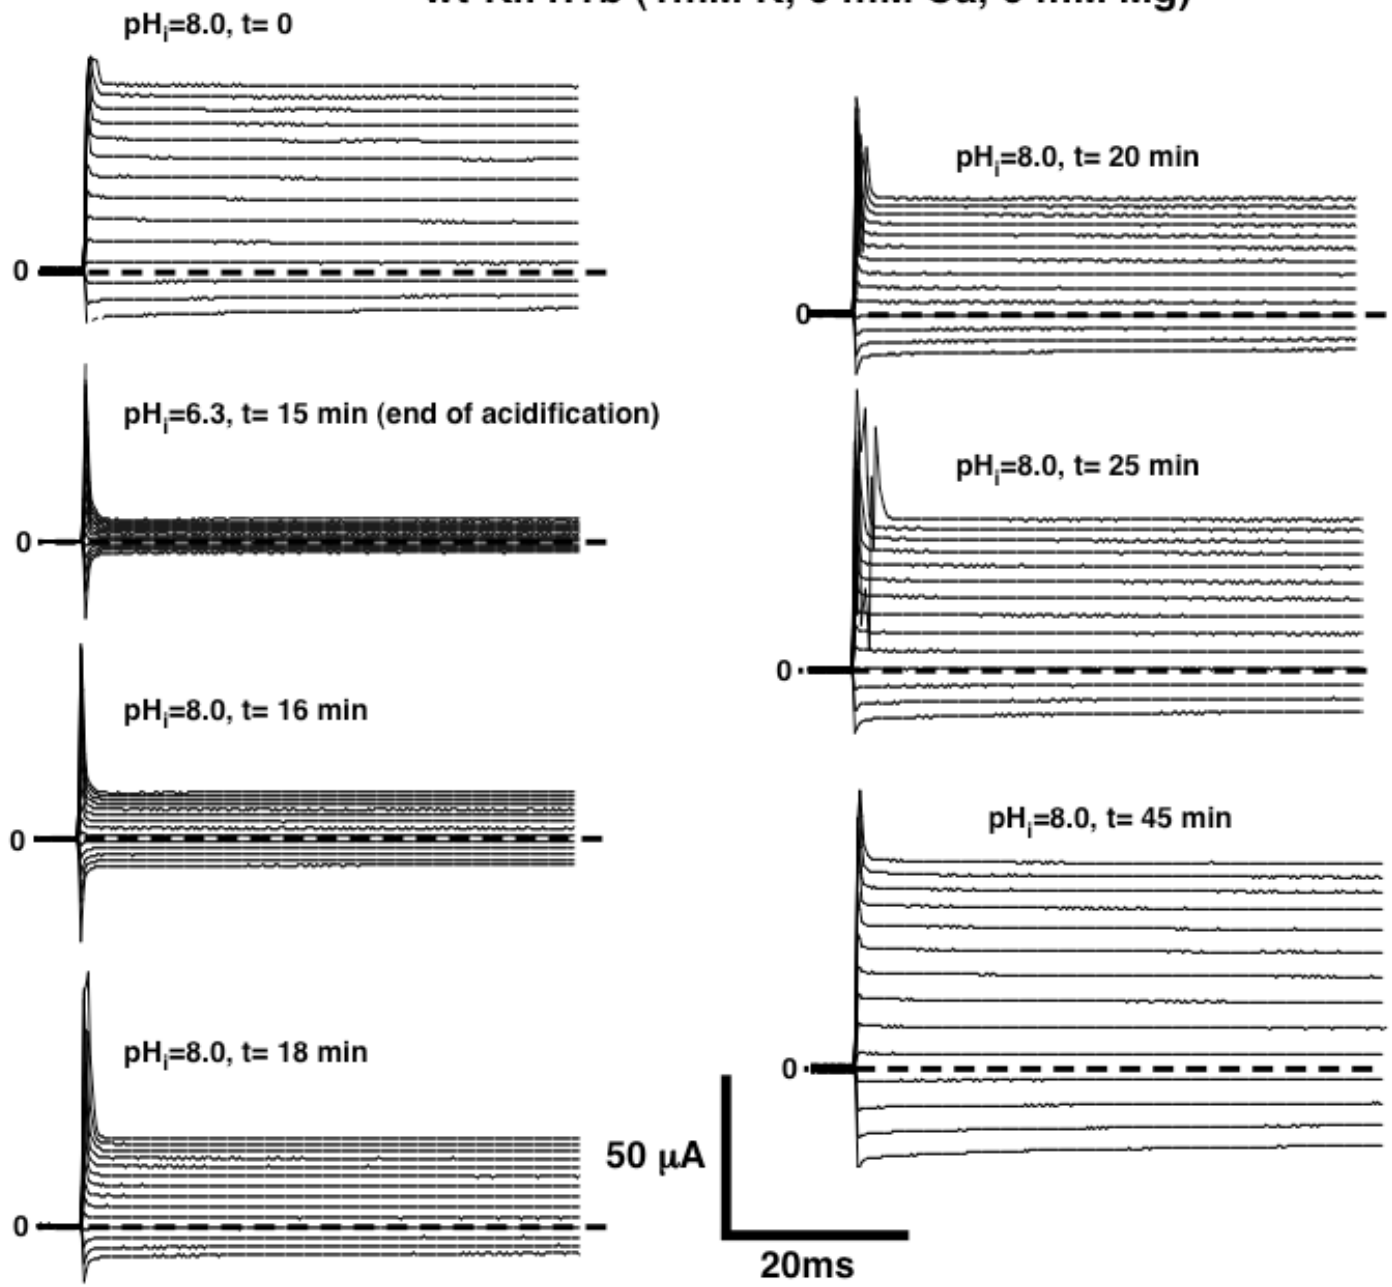

**Fig S1B:**

**wt-Kir1.1b (1mM K, 0 mM Ca, 0 mM Mg)**

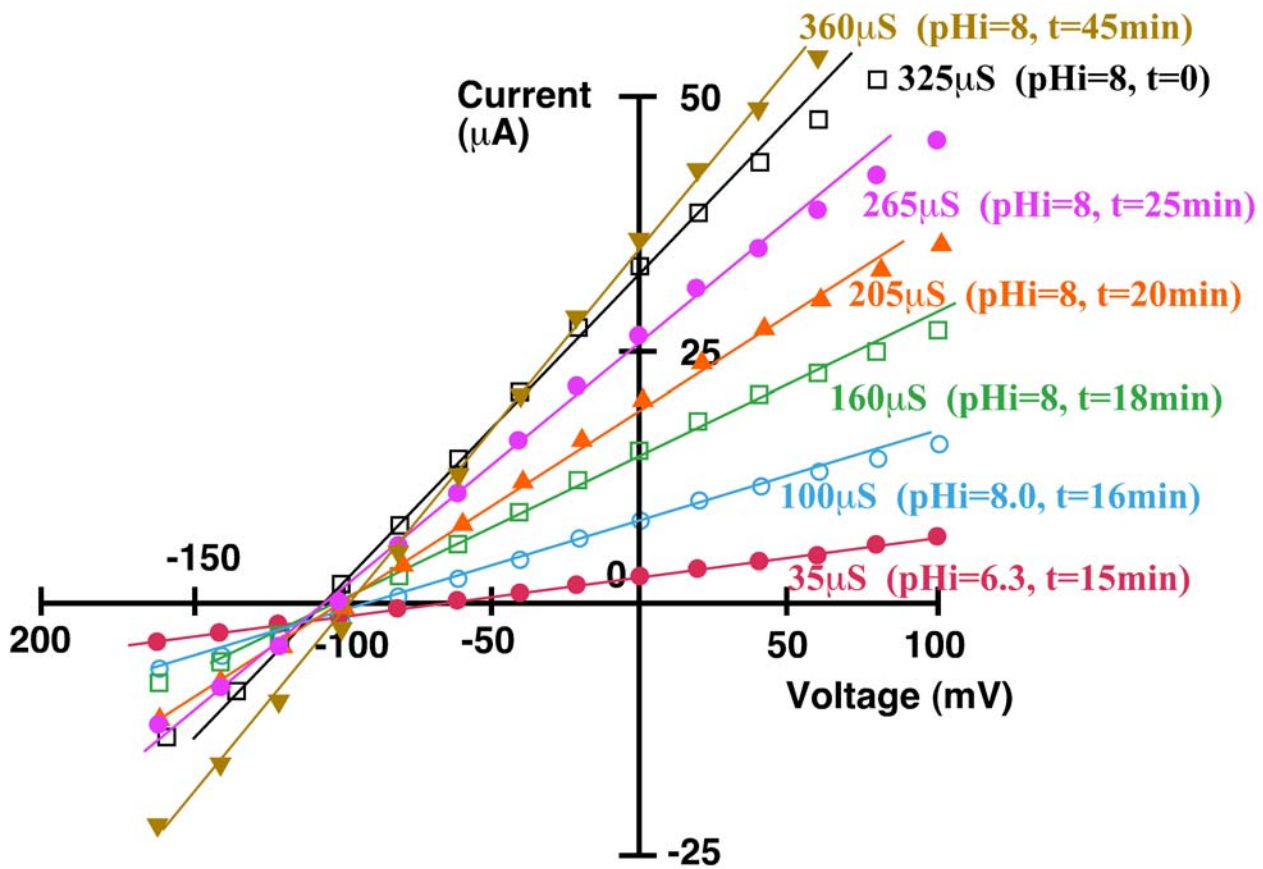

**Fig S2A:**

**wt-Kir1.1b (1mM K, 2mM Ca, 0Mg)**

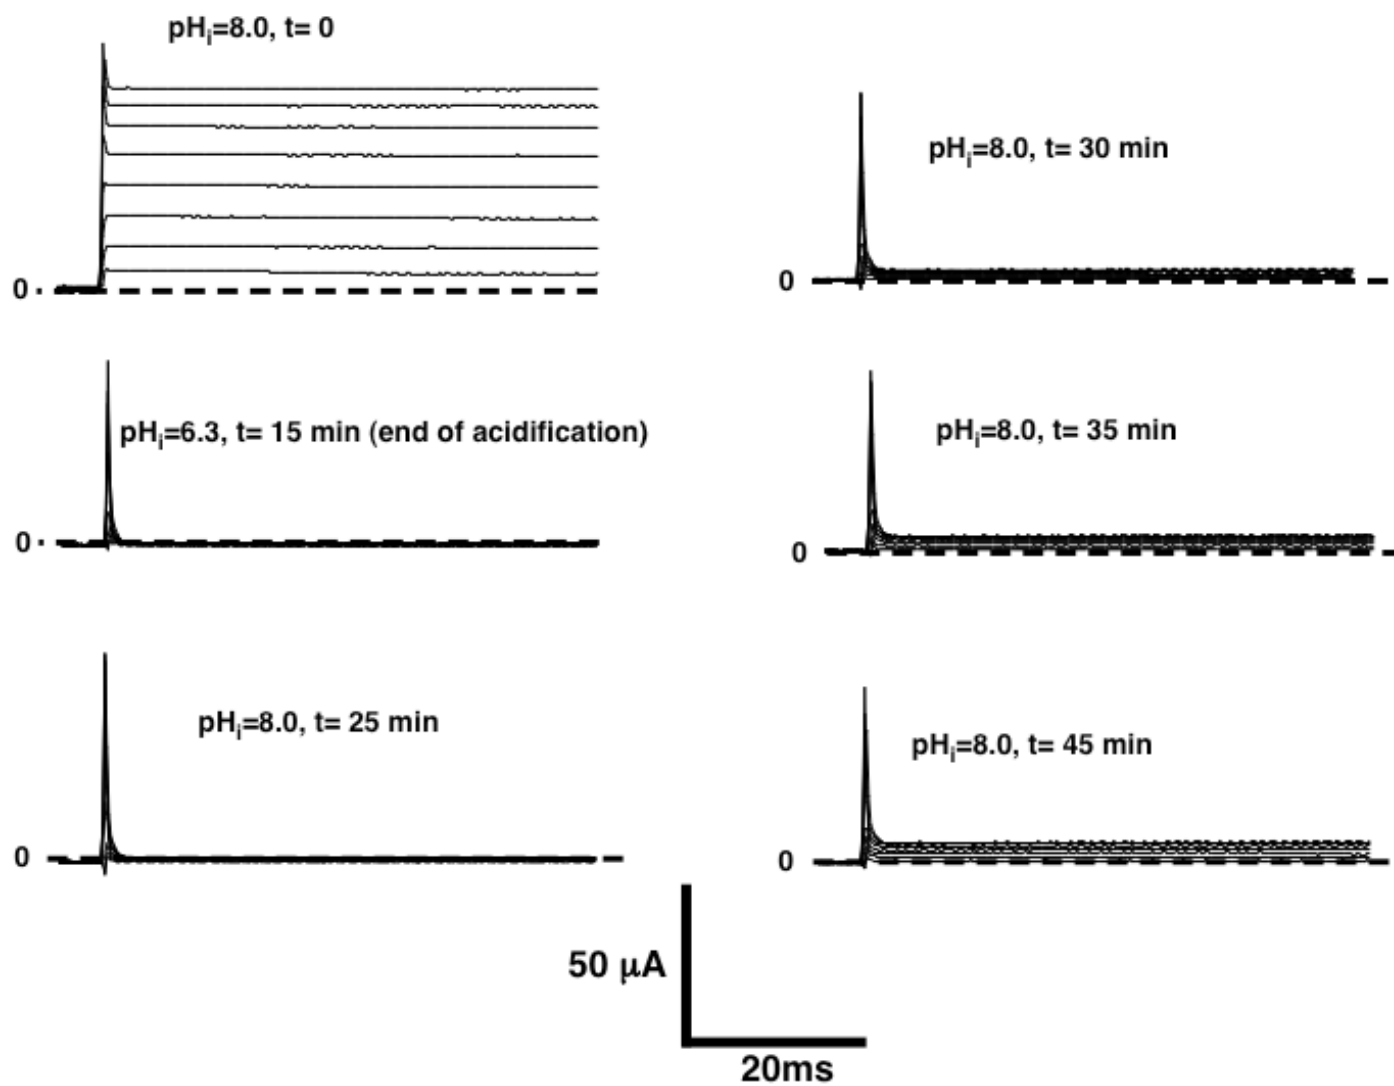

**Fig S2B:**  
**wt-Kir1.1b (1mM K, 2 mM Ca, 0 Mg)**

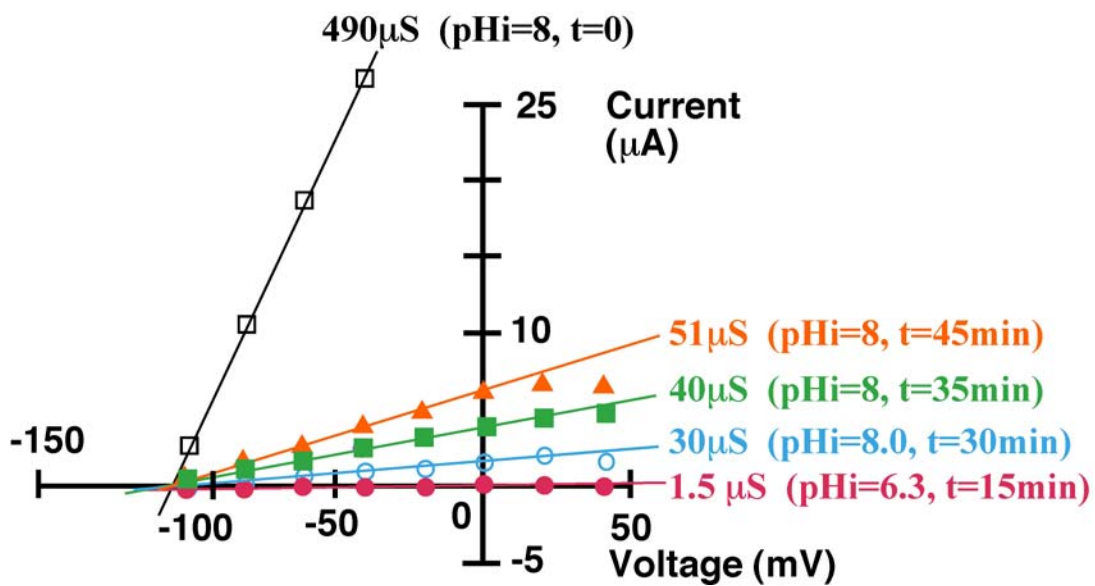

Fig S3:

Initial Recovery rates in zero divalent media

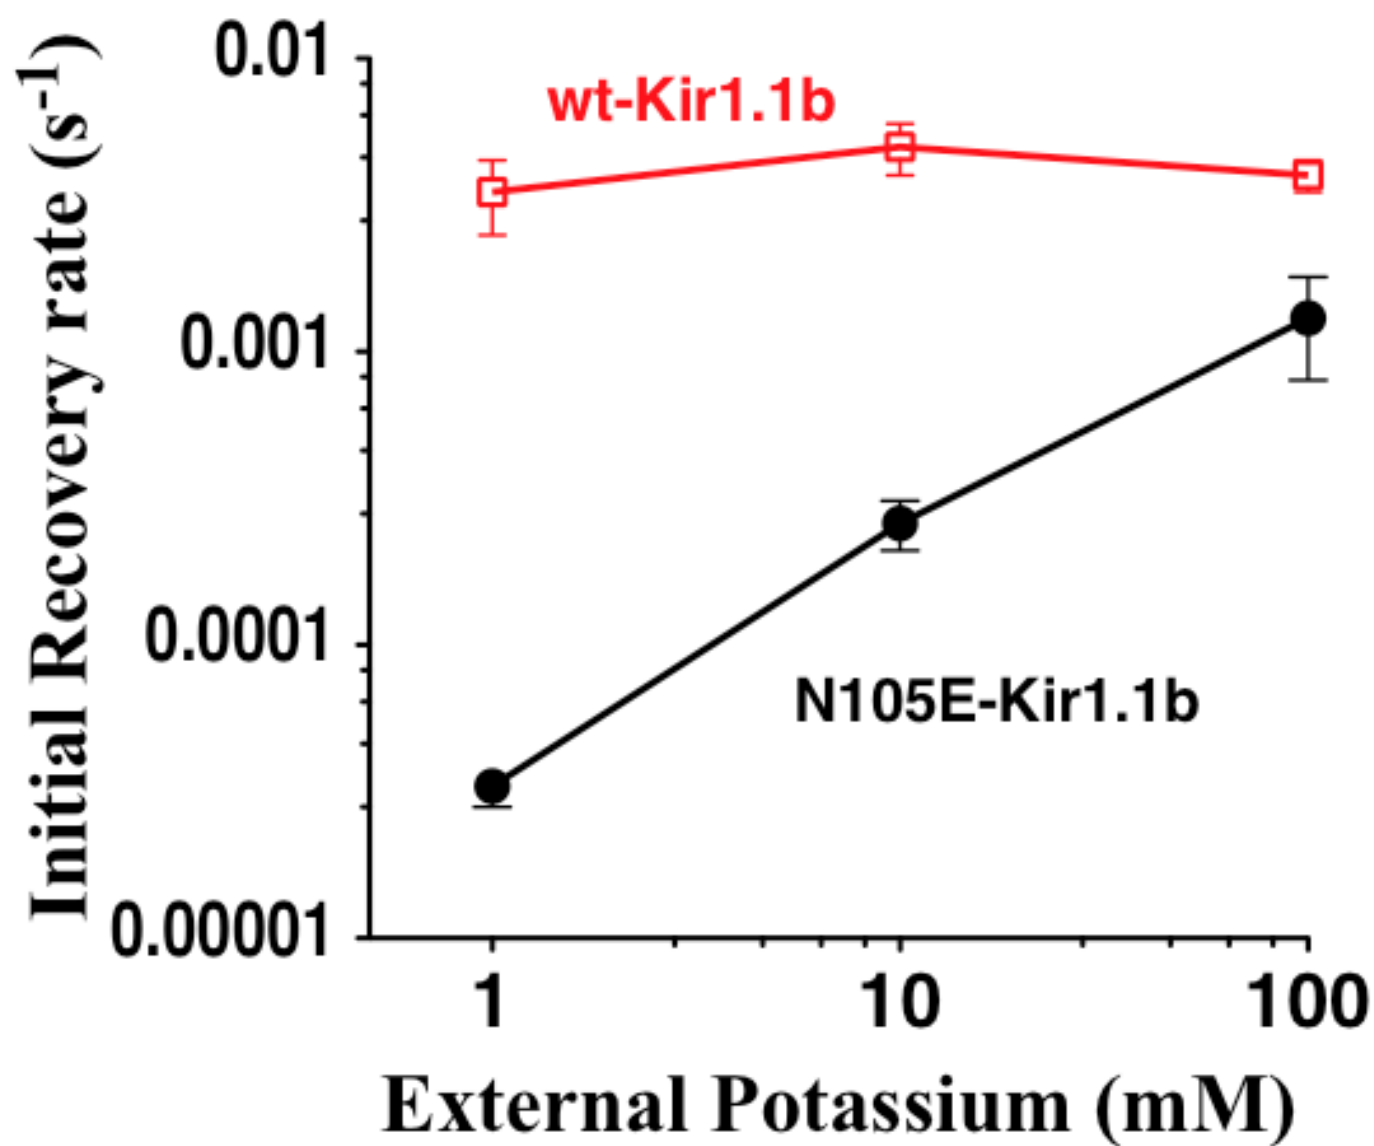

Supplement: mmc1.pdf [file mmc1.pdf]
